# Supplementary material for: An 8.7% efficiency co-electrodeposited Cu2ZnSnS4 photovoltaic device fabricated via a pressurized post-sulfurization process
Source: Royal Society of Chemistry journal article supplement (doi:10.1039/c8tc05058a), 2018-01-01
Supplement: c8tc05058a1.pdf [file c8tc05058a1.pdf]

**Electronic Supplementary Information for:**

**An 8.7% efficiency co-electrodeposited Cu<sub>2</sub>ZnSnS<sub>4</sub> photovoltaic device  
fabricated via a pressurized post-sulfurization process**

Chuanjun Zhang<sup>b</sup>, Jiahua Tao<sup>\*a,c</sup>, and Junhao Chu<sup>a,b</sup>

<sup>a</sup> Key Laboratory of Polar Materials and Devices, Ministry of Education, Department of Electronic Engineering, East China Normal University, Shanghai 200241, China.

<sup>b</sup> National Laboratory for Infrared Physics, Shanghai Institute of Technical Physics, Chinese Academy of Sciences, Shanghai 200083, China.

<sup>c</sup> School of Physics and Materials Science, East China Normal University, Shanghai 200241, China

\*Corresponding author. E-mail: [jhtao@phy.ecnu.edu.cn](mailto:jhtao@phy.ecnu.edu.cn) (JH. Tao).

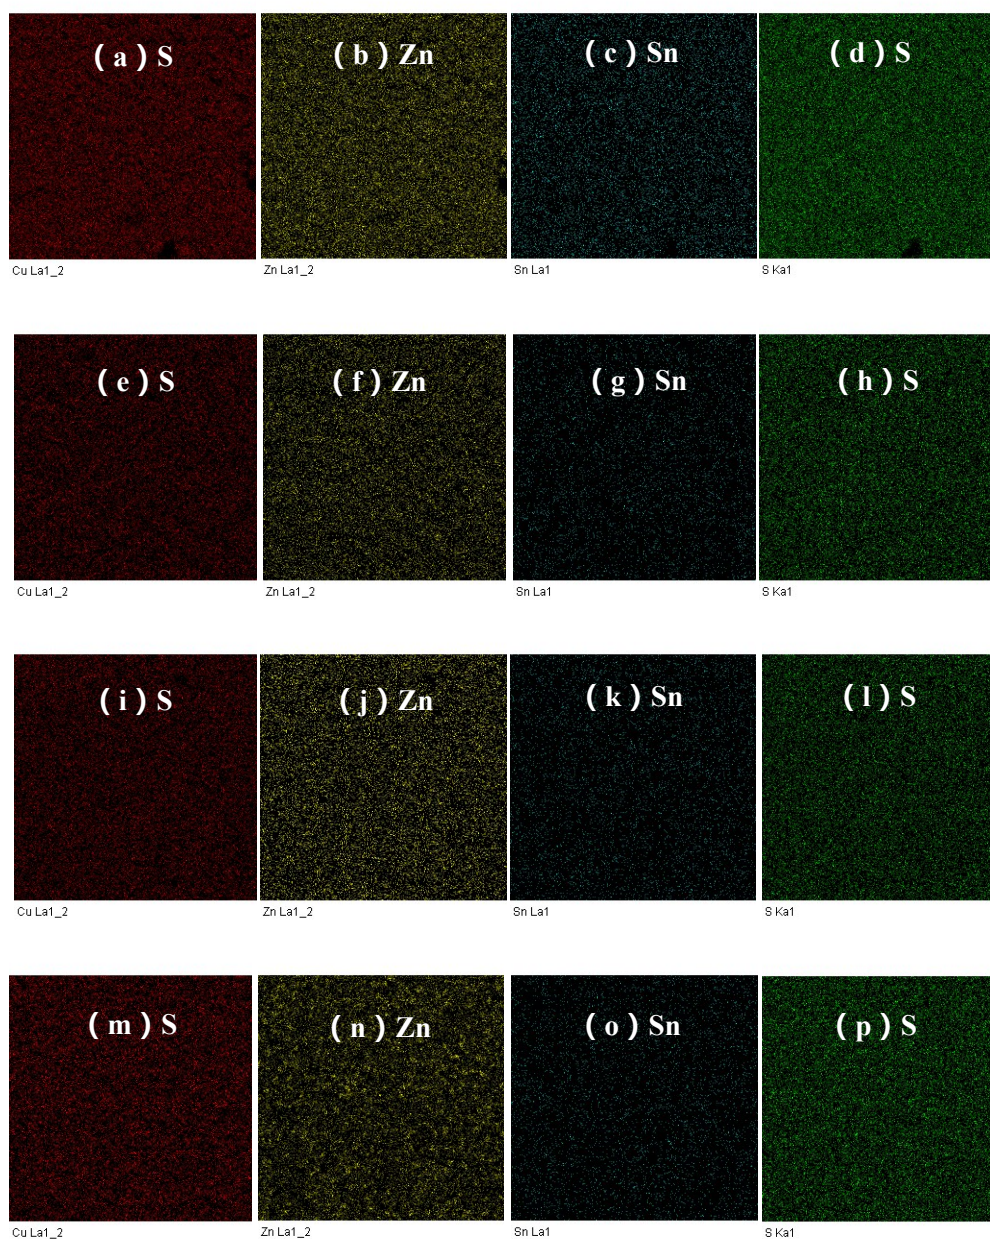

**Fig. S1.** The surface EDS mappings of CZTS films sulfurized at process pressure of 10 Torr (a, b, c, d), 20 Torr (e, f, g, h), 40 Torr (i, j, k, l) and 60 Torr (m, n, o, p).

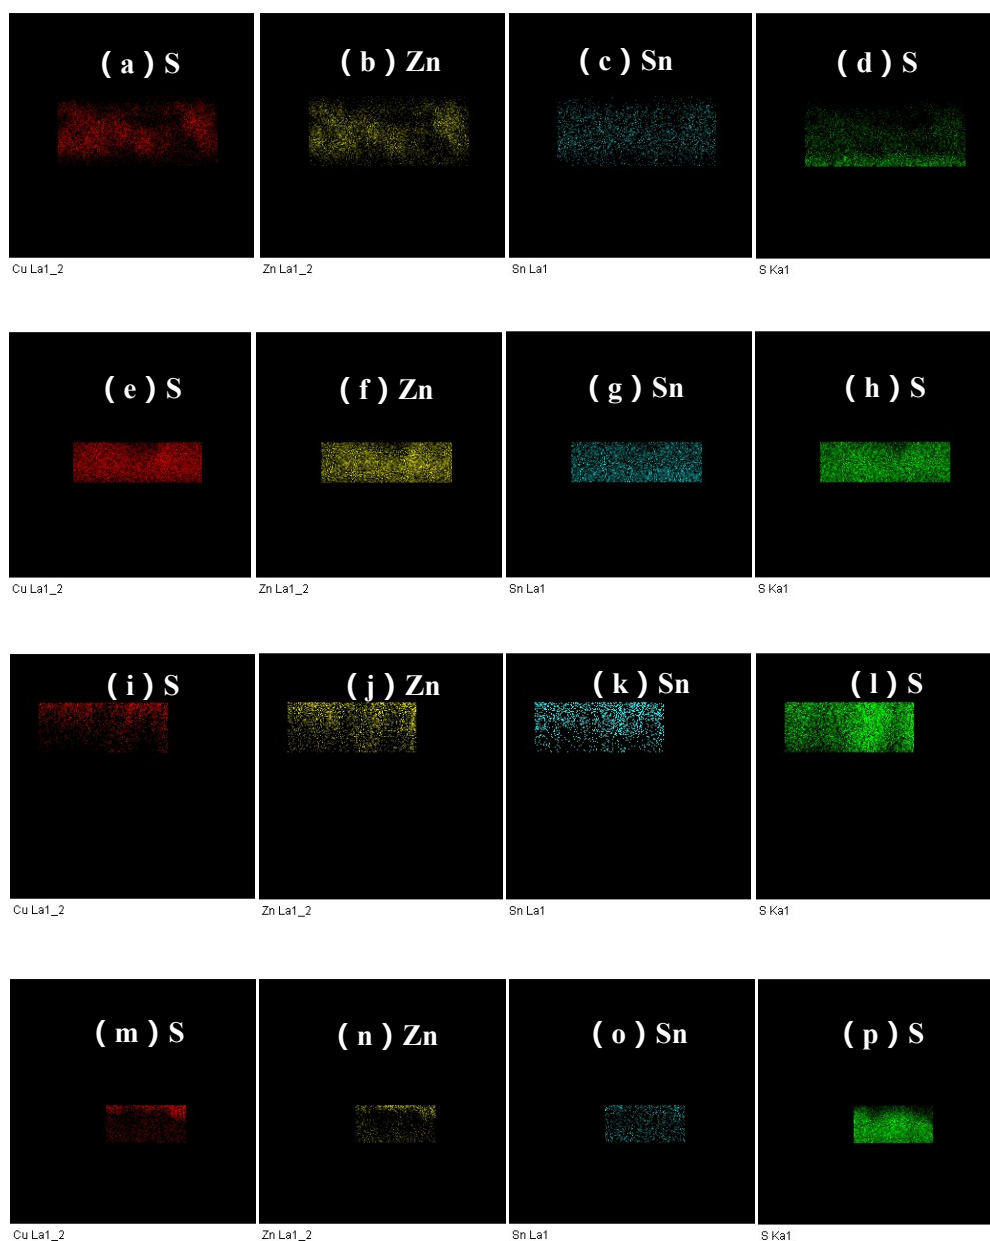

**Fig. S2.** The cross-sectional EDS mappings of CZTS films sulfurized at process pressure of 10 Torr (a, b, c, d), 20 Torr (e, f, g, h), 40 Torr (i, j, k, l), and 60 Torr (m, n, o, p).
